# Supplementary material for: (Chlorosulfonyl)(trifluoromethanesulfonyl)imide—a versatile building block for battery electrolytes
Source: Royal Society of Chemistry journal article supplement (doi:10.1039/d3ya00110e), 2023-01-01
Supplement: d3ya00110e1.pdf [file d3ya00110e1.pdf]

## Supporting Information

# **(Chlorosulfonyl)(trifluoromethanesulfonyl)imide — A** **Versatile Building Block for Battery Electrolytes**

Letao Jin, Ziyu Song, Heng Zhang\*, Zhibin Zhou, Wenfang Feng\*

*Key Laboratory of Material Chemistry for Energy Conversion and Storage (Ministry of Education), School of Chemistry and Chemical Engineering, Huazhong University of Science and Technology, 1037 Luoyu Road, Wuhan 430074, China*

\*Corresponding authors

Prof. Heng Zhang - E-mail: [hengzhang2020@hust.edu.cn](mailto:hengzhang2020@hust.edu.cn)

Prof. Wenfang Feng - E-mail: [fengwenfang@hust.edu.cn](mailto:fengwenfang@hust.edu.cn)

## List of contents

|                                                                    |    |
|--------------------------------------------------------------------|----|
| 1. Materials and Characterizations.....                            | 3  |
| 2. Experimental Details.....                                       | 5  |
| 2.1 Synthesis of zwitterion compounds .....                        | 5  |
| 2.2 Chemical reactions between H[CITFSI] and tertiary amines ..... | 6  |
| 3 Supplementary Schemes, Tables and Figures.....                   | 7  |
| References .....                                                   | 23 |

## 1. Materials and Characterizations

**Materials.** Acetonitrile (MeCN, Sinopharm Chemical Reagent Co., Ltd), dichloromethane (Sinopharm Chemical Reagent Co., Ltd), methyl tertiary butyl ether (Sinopharm Chemical Reagent Co., Ltd), dimethylethylamine (DMEA, **4a**, Shanghai Aladdin Biochemical Technology Co., Ltd.), diethylmethylamine (DEMA, **4b**, Shanghai Aladdin Biochemical Technology Co., Ltd.), triethylamine (TEA, **4c**, Shanghai Aladdin Biochemical Technology Co., Ltd.), *N,N*-diisopropylethylamine (DIPEA, **4d**, Shanghai Aladdin Biochemical Technology Co., Ltd.), pyridine (Py, **4e**, Shanghai Aladdin Biochemical Technology Co., Ltd.), 2-methylpyridine (MPy, **4f**, Shanghai Aladdin Biochemical Technology Co., Ltd.), and 2,6-dimethylpyridine (DMPy, **4g**, Shanghai Aladdin Biochemical Technology Co., Ltd.), thionyl chloride (SOCl<sub>2</sub>, Sinopharm Chemical Reagent Co., Ltd), chlorosulfonic acid (ClSO<sub>3</sub>H, Shanghai Aladdin Biochemical Technology Co., Ltd.) and trifluoromethanesulfonamide (CF<sub>3</sub>SO<sub>2</sub>NH<sub>2</sub>, Solvay). All the solvents were dried and purified using standard procedures before use.<sup>4</sup>

**Structural characterizations.** The spectra of <sup>1</sup>H- (399.65 MHz), <sup>19</sup>F- (376.05 MHz), and <sup>13</sup>C- (101.00 MHz) nuclear magnetic resonance (NMR) were recorded on a Bruker AV400 spectrometer using acetone-*d*<sub>6</sub> as the deuterated solvent. Chemical shift values are reported in ppm with respect to tetramethylsilane (TMS) internal reference for <sup>1</sup>H and <sup>13</sup>C NMR and external reference trichlorofluoromethane (CCl<sub>3</sub>F) in acetone-*d*<sub>6</sub> for <sup>19</sup>F NMR. Mass spectra characterization was performed on a high-performance liquid chromatography-electrospray time-of-flight high-resolution mass spectrometer (Agilent 1100 LC/MSD, Agilent, USA). The sample (ca. 8–10 mg) was dissolved in acetonitrile or methanol (300 μL). Infrared spectral characterization was performed on a Fourier transform infrared spectroscopy (FT-IR, Bruker Equinox 55, Bruker, Germany) with the wavenumber ranging from 4000 to 400 cm<sup>-1</sup>.

**Single-crystal X-ray diffraction (XRD) characterizations.** Single-crystal XRD characterizations were performed on a single-crystal diffractometer (XtaLAB PRO MM007HF Cu, Rigaku, Japan). The analytical software (Olex2) was used to analyze the single crystal structure data of the compound,<sup>5</sup> and the open-source software Diamond was used to draw the oak ridge thermal ellipsoid plot diagram of the single crystal structure of the compound.<sup>6</sup> The crystallographic data (*i.e.*, CCDC 2218540 and 2218543) for this work could be accessed free of charge via [www.ccdc.cam.ac.uk/data\\_request/cif](http://www.ccdc.cam.ac.uk/data_request/cif), or by emailing [data\\_request@ccdc.cam.ac.uk](mailto:data_request@ccdc.cam.ac.uk), or by contacting The Cambridge Crystallographic Data Centre, 12 Union Road, Cambridge CB2; fax: +44 1223 336033.

**Thermal properties.** Thermogravimetric analysis (TGA) characterizations were performed on a thermogravimetric analyzer (Diamond TG/DTA, PerkinElmer Instruments, USA). The sample (ca. 5–10 mg) was put into an aluminum pan and heated at a ratio of 10 °C min<sup>-1</sup> from 30 to 800 °C under a flow of argon. The temperature at which 5% weight lost was defined as the decomposition temperature (*T*<sub>d</sub>). Differential scanning calorimetry (DSC) characterization was acquired on a Netzsch DSC instrument (DSC 200 F3, Netzsch, Germany). Following the initial cooling scan from ambient temperature to -70 °C, two continuous cooling-heating scans from -70 to 150 °C were applied and the scan rates for both cooling and heating processes were kept at 10 °C min<sup>-1</sup>. The onset and the peak of heat capacity changes were used to define the melting point (*T*<sub>m</sub>).

**General procedure for experimental of hydrolysis.** Hydrolysis of H[CITFSI] and as-prepared zwitterion compounds (**6c** and **6e**) was carried out in 25 mL sealed glass bottle, and their experimental steps were

similar. In a typical experiment (*i.e.*, H[CITFSI]), to a stirred solution of H[CITFSI] (1.25 g, 5 mmol) in dichloromethane (15 mL), a certain amount of deionized water (H<sub>2</sub>O, 9 mg, 5 mmol) was added. The resulting mixture was left stirring under room temperature for required durations, and then subjected to NMR characterizations with co-axial NMR tubes, as described in our previous work.<sup>4</sup>

## 2. Experimental Details

### 2.1 Synthesis of zwitterion compounds

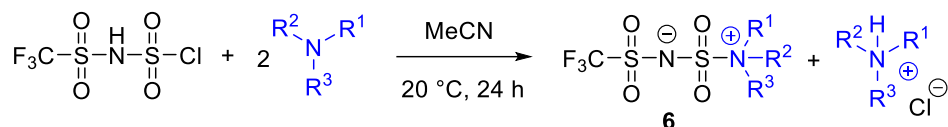

First, (chlorosulfonyl)(trifluoromethanesulfonyl)imide (H[N(SO<sub>2</sub>Cl)(SO<sub>2</sub>CF<sub>3</sub>)], H[CITFSI]) was synthesized following the procedures reported in previous work.<sup>1</sup> Typically, to a stirred flask containing a predetermined amount of CF<sub>3</sub>SO<sub>2</sub>NH<sub>2</sub> (40.04 g, 0.27 mol), the solution of ClSO<sub>3</sub>H (44.25 g, 0.38 mol) and SOCl<sub>2</sub> (73.71 g, 0.62 mol) was added at room temperature. The resulting mixture was left under reflux (*ca.* 120 °C) for 48 h. The product, H[CITFSI], was readily obtained as white solid (63.06 g, 0.26 mol; yield 95%) by distillation under vacuum (110 °C/2 mmHg).

Subsequently, the zwitterion compounds (**6a**, **6b**, **6c**, and **6e**) were obtained from nucleophilic substitution reactions between H[CITFSI] and different tertiary amines. Taking compound **6c** (i.e., R<sup>1</sup> = R<sup>2</sup> = R<sup>3</sup> = CH<sub>2</sub>CH<sub>3</sub>) as an example, to a stirred solution of H[CITFSI] (5.20 g, 21 mmol) in acetonitrile (50 mL), TEA (4.34 g, 43 mmol) was added dropwise at room temperature, and the resulting solution was stirred for 24 h. The insoluble phase was removed by filtration, and the supernatant liquid phase was concentrated under reduced pressure. The as-obtained yellow solid was washed three times with deionized water (50 mL) and then recrystallized with dichloromethane/methyl tert-butyl ether, resulting in (triethylammoniosulfonyl)(trifluoromethanesulfonyl)imide **6c** as a white solid (3.93 g, 13 mmol, 60% yield). m.p. 62 °C; <sup>1</sup>H NMR (400 MHz; acetone-*d*<sub>6</sub>; TMS; ppm): δ<sub>H</sub> = 3.71 (q, *J*<sub>H-H</sub> = 7.3 Hz, 6H, —CH<sub>2</sub>CH<sub>3</sub>), 1.49 (t, *J*<sub>H-H</sub> = 7.4 Hz, 9H, —CH<sub>2</sub>CH<sub>3</sub>); <sup>19</sup>F NMR (376 MHz; acetone-*d*<sub>6</sub>; CFCl<sub>3</sub>; ppm): δ<sub>F</sub> = -79.9 (s, —CF<sub>3</sub>); <sup>13</sup>C NMR (101 MHz, acetone-*d*<sub>6</sub>; ppm): δ<sub>C</sub> = 205.2, 124.4, 121.2, 118.1, 114.9, 51.9, 29.5, 29.3, 29.1, 28.9, 28.7, 28.6, 28.4, 8.6; FT-IR (KBr, ν<sub>max</sub>, cm<sup>-1</sup>): 3008 (m), 2953 (m), 1465 (s), 1377 (vs), 1349 (vs), 1346 (vs), 1216 (s), 1198 (vs), 1069 (vs), 1001 (s), 896 (m), 837 (m), 785 (s), 712 (s), 609 (s), 548 (s), 523 (vs); ESI-MS (m/z) calcd. for [C<sub>7</sub>H<sub>15</sub>F<sub>3</sub>S<sub>2</sub>O<sub>4</sub>N<sub>2</sub> + Na]<sup>+</sup>: 335.0323; found: 335.0870.

Following a similar procedure described for **6c** except replacing TEA with DMEA, the (dimethylethylammoniosulfonyl)(trifluoromethanesulfonyl)imide **6a** was obtained as a white solid (3.51 g, 16 mmol, 78% yield). m.p. 56 °C; <sup>1</sup>H NMR (400 MHz; acetone-*d*<sub>6</sub>; TMS; ppm): δ<sub>H</sub> = 3.74 (q, *J*<sub>H-H</sub> = 7.3 Hz, 2H, —CH<sub>2</sub>CH<sub>3</sub>), 3.30 (s, 6H, —CH<sub>3</sub>), 1.61–1.50 (m, 3H, —CH<sub>2</sub>CH<sub>3</sub>); <sup>19</sup>F NMR (376 MHz; acetone-*d*<sub>6</sub>; CFCl<sub>3</sub>; ppm): δ<sub>F</sub> = -79.8 (s, —CF<sub>3</sub>); <sup>13</sup>C NMR (101 MHz, acetone-*d*<sub>6</sub>; ppm): δ<sub>C</sub> = 56.1, 56.1, 56.1, 44.8, 44.7, 44.7, 8.2; FT-IR (KBr, ν<sub>max</sub>, cm<sup>-1</sup>): 3056 (w), 3001 (w), 1620 (m), 1479 (s), 1379 (vs), 1201 (vs), 1070 (vs), 1006 (s), 975 (s), 910 (s), 783 (s), 746 (s), 621 (vs), 563 (s), 522 (s); ESI-MS (m/z) calcd. for [C<sub>5</sub>H<sub>11</sub>F<sub>3</sub>N<sub>2</sub>O<sub>4</sub>S<sub>2</sub> + Na]<sup>+</sup>: 307.0010; found: 307.0525.

Following a similar procedure described for **6c** except replacing TEA with DEMA, the (diethylmethylammoniosulfonyl)(trifluoromethanesulfonyl)imide **6b** was obtained as a white solid (4.13 g, 14 mmol, 66% yield). m.p. 57 °C; <sup>1</sup>H NMR (400 MHz; acetone-*d*<sub>6</sub>; TMS; ppm): δ<sub>H</sub> = 3.73 (ddt, *J*<sub>H-H</sub> = 32.2, 13.8, 7.2 Hz, 4H, —CH<sub>2</sub>CH<sub>3</sub>), 3.25 (s, 3H, —CH<sub>3</sub>), 1.50 (tt, *J*<sub>H-H</sub> = 7.3, 1.8 Hz, 6H, —CH<sub>2</sub>CH<sub>3</sub>); <sup>19</sup>F NMR (376 MHz; acetone-*d*<sub>6</sub>; CFCl<sub>3</sub>; ppm): δ<sub>F</sub> = -79.8 (s, —CF<sub>3</sub>); <sup>13</sup>C NMR (101 MHz, acetone-*d*<sub>6</sub>; ppm): δ<sub>C</sub> = 121.2, 118.1, 53.2, 53.2, 53.2, 43.5, 43.4, 43.4, 8.6; FT-IR (KBr, ν<sub>max</sub>, cm<sup>-1</sup>): 3012 (m), 1635 (w), 1467 (s), 1361 (vs), 1195 (vs), 1085 (vs), 1002 (s), 962 (s), 877 (m), 779 (s), 715 (s), 617 (vs), 563 (vs), 518 (vs); ESI-MS (m/z) calcd. for

$[\text{C}_6\text{H}_{13}\text{F}_3\text{N}_2\text{O}_4\text{S}_2 + \text{Na}]^+$ : 321.0161; found: 321.0684.

Following a similar procedure described for **6c** except replacing TEA with Py, the (pyridinosulfonyl)(trifluoromethanesulfonyl)imide **6e** was obtained as a white solid (2.43 g, 8.4 mmol, 42% yield). m.p. 117 °C; **<sup>1</sup>H NMR** (400 MHz; acetone-*d*<sub>6</sub>; TMS; ppm):  $\delta_{\text{H}} = 9.45$  (d,  $J_{\text{H-H}} = 6.1$  Hz, 2H, —NCHCHCH—), 8.95 (t,  $J_{\text{H-H}} = 8.1$  Hz, 1H, —NCHCHCH—), 8.43 (t,  $J_{\text{H-H}} = 7.1$  Hz, 2H, —NCHCHCH—); **<sup>19</sup>F NMR** (376 MHz; acetone-*d*<sub>6</sub>; CFCl<sub>3</sub>; ppm):  $\delta_{\text{F}} = -79.5$  (s, —CF<sub>3</sub>); **<sup>13</sup>C NMR** (101 MHz, acetone-*d*<sub>6</sub>; ppm):  $\delta_{\text{C}} = 205.5, 149.1, 140.9, 140.4, 128.3, 127.8, 127.7$ ; **FT-IR** (KBr,  $\nu_{\text{max}}$ , cm<sup>-1</sup>): 3136 (m), 3095 (w), 1613 (s), 1466 (s), 1393 (vs), 1346 (vs), 1216 (s), 1198 (vs), 1141 (s), 1060 (vs), 1044 (s), 864 (s), 794 (s), 774 (s), 677 (s), 627 (s), 605 (s), 563 (vs), 522 (s); **ESI-MS** (m/z) calcd. for  $[\text{C}_6\text{H}_5\text{F}_3\text{N}_2\text{O}_4\text{S}_2 + \text{K}]^+$ : 328.9280; found: 328.9300.

## 2.2 Chemical reactions between H[CITFSI] and tertiary amines

The experimental procedures of H[CITFSI] with equal or twice amounts of tertiary amines (including DMEA, DEMA, TEA, DIPEA, Py, MPy, and DMPy) were carried out using an air-tight glass tube. In a typical example, H[CITFSI] (0.25 g, 1 mmol), acetonitrile (3 mL) and TEA (0.11 g, 1 mmol) were mixed under room temperature and left stirring under a given temperature (e.g., 20 or 80 °C) for 24 h. The reaction products were characterized by NMR characterizations with co-axial NMR tubes, as described in our previous work.<sup>4</sup>

### 3 Supplementary Schemes, Tables, and Figures

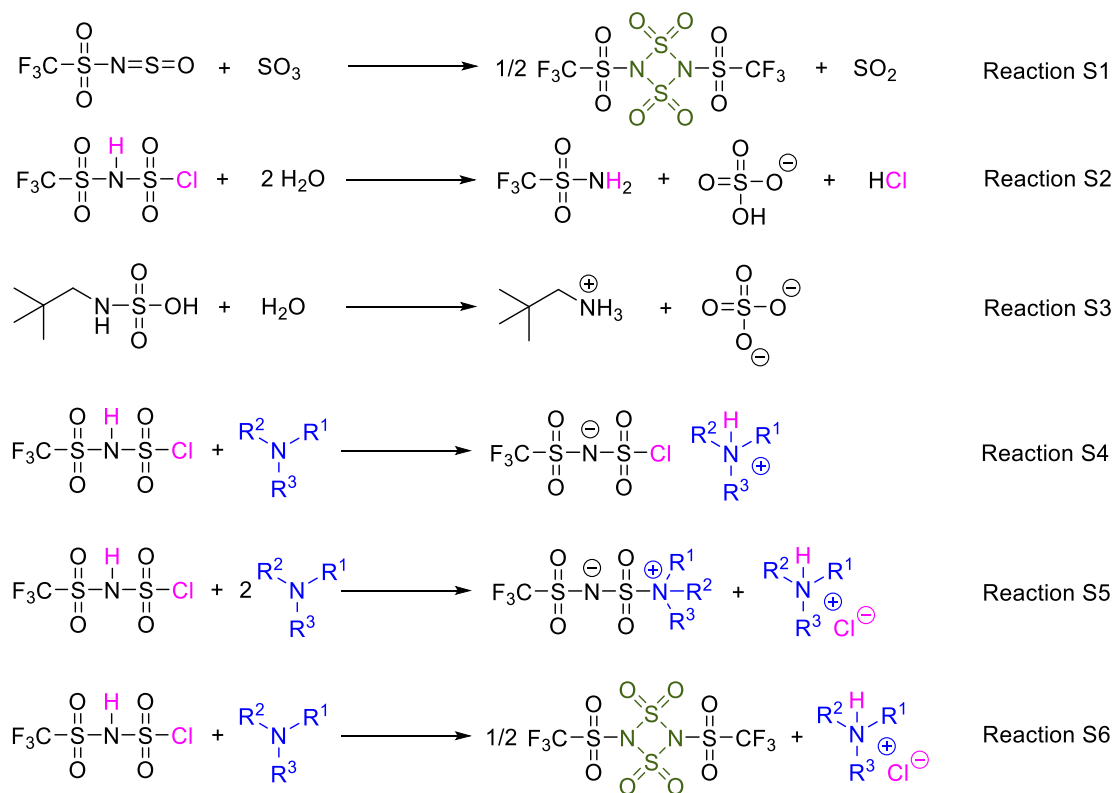

**Scheme S1.** Summary of the reactions discussed in this work.

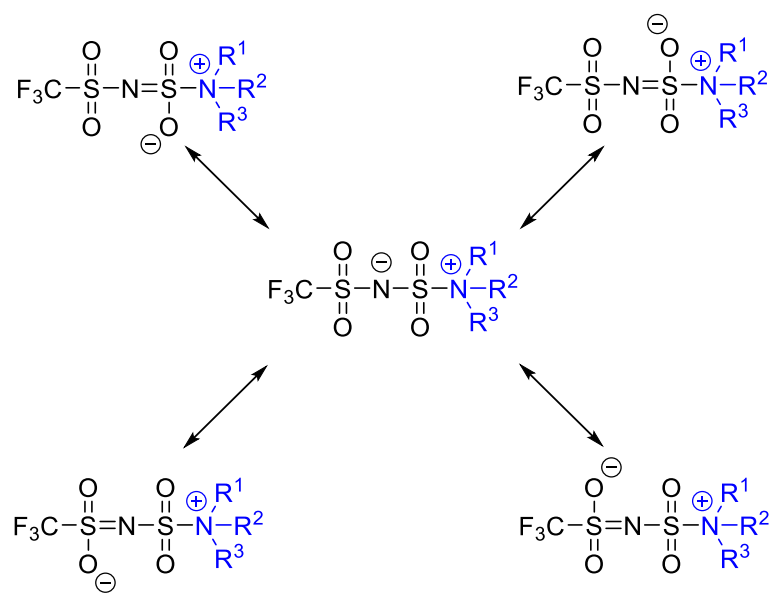

**Scheme S2.** Negative delocalization of the sulfonimide-type zwitterion compounds.



**Table S1.** Experimental results of the reaction of H[CITFSI] with equivalent amount of tertiary amines.

| Entry | Base      | Temperature / °C | NMR yield / %  |                |                |                |
|-------|-----------|------------------|----------------|----------------|----------------|----------------|
|       |           |                  | 5 <sup>a</sup> | 6 <sup>a</sup> | 7 <sup>a</sup> | 8 <sup>a</sup> |
| S1    | <b>4a</b> | 20               | 87             | 4              | 0              | 9              |
| S2    | <b>4b</b> | 20               | 90             | 5              | 0              | 5              |
| S3    | <b>4c</b> | 20               | 88             | 0              | 0              | 12             |
| S4    | <b>4d</b> | 20               | 93             | 0              | 0              | 7              |
| S5    | <b>4e</b> | 20               | 79             | 0              | 0              | 21             |
| S6    | <b>4f</b> | 20               | 88             | 0              | 1              | 11             |
| S7    | <b>4g</b> | 20               | 84             | 0              | 0              | 16             |
| S8    | <b>4a</b> | 80               | 65             | 0              | 0              | 35             |
| S9    | <b>4b</b> | 80               | 79             | 0              | 0              | 21             |
| S10   | <b>4c</b> | 80               | 88             | 0              | 0              | 12             |
| S11   | <b>4d</b> | 80               | 4              | 0              | 11             | 85             |
| S12   | <b>4e</b> | 80               | 80             | 0              | 0              | 20             |
| S13   | <b>4f</b> | 80               | 82             | 0              | 3              | 15             |
| S14   | <b>4g</b> | 80               | 90             | 0              | 0              | 10             |

<sup>a</sup>5, 6, 7, and 8 represent neutralization products, nucleophilic substitution products, elimination products, and trifluoromethanesulfonamide (CF<sub>3</sub>SO<sub>2</sub>NH<sub>2</sub>), respectively.

**Table S2.** Assignments of the NMR spectral peaks for the species reported in this work.

| Compounds                                                                                              | Abbreviation | Assignments                                  | $\delta$ ( $^1\text{H}$ NMR)<br>/ ppm) / ( $J_{\text{H-H}}$ / Hz) | $\delta$ ( $^{19}\text{F}$ NMR)<br>/ ppm) / ( $J_{\text{F-F}}$ / Hz) | Ref.                    |
|--------------------------------------------------------------------------------------------------------|--------------|----------------------------------------------|-------------------------------------------------------------------|----------------------------------------------------------------------|-------------------------|
| $\text{CF}_3\text{SO}_2\text{N}^{(-)}\text{SO}_2\text{N}^{(+)}(\text{CH}_3)_2(\text{CH}_2\text{CH}_3)$ | <b>6a</b>    | $-\underline{\text{C}}\text{H}_2\text{CH}_3$ | 3.74 (q, 7.3)                                                     |                                                                      | This work               |
|                                                                                                        |              | $-\underline{\text{C}}\text{H}_3$            | 3.30 (s)                                                          |                                                                      |                         |
|                                                                                                        |              | $-\text{CH}_2\underline{\text{C}}\text{H}_3$ | 1.55 (m)                                                          |                                                                      |                         |
|                                                                                                        |              | $-\underline{\text{C}}\text{F}_3$            |                                                                   | -79.8 (s)                                                            |                         |
| $\text{CF}_3\text{SO}_2\text{N}^{(-)}\text{SO}_2\text{N}^{(+)}(\text{CH}_3)(\text{CH}_2\text{CH}_3)_2$ | <b>6b</b>    | $-\underline{\text{C}}\text{H}_2\text{CH}_3$ | 3.73 (ddt, 32.2, 13.8, 7.2)                                       |                                                                      | This work               |
|                                                                                                        |              | $-\text{CH}_2\underline{\text{C}}\text{H}_3$ | 1.50 (tt, 7.3, 1.8)                                               |                                                                      |                         |
|                                                                                                        |              | $-\underline{\text{C}}\text{H}_3$            | 3.25 (s)                                                          |                                                                      |                         |
|                                                                                                        |              | $-\underline{\text{C}}\text{F}_3$            |                                                                   | -79.8 (s)                                                            |                         |
| $\text{CF}_3\text{SO}_2\text{N}^{(-)}\text{SO}_2\text{N}^{(+)}(\text{CH}_2\text{CH}_3)_3$              | <b>6c</b>    | $-\underline{\text{C}}\text{H}_2\text{CH}_3$ | 3.71 (q, 7.3)                                                     |                                                                      | This work               |
|                                                                                                        |              | $-\text{CH}_2\underline{\text{C}}\text{H}_3$ | 1.49 (t, 7.4)                                                     |                                                                      |                         |
|                                                                                                        |              | $-\underline{\text{C}}\text{F}_3$            |                                                                   | -79.9 (s)                                                            |                         |
| $\text{CF}_3\text{SO}_2\text{N}^{(-)}\text{SO}_2\text{N}^{(+)}\text{C}_5\text{H}_5$                    | <b>6e</b>    | $-\text{N}\underline{\text{C}}\text{HCHCH}-$ | 9.45 (d, 6.1)                                                     |                                                                      | This work               |
|                                                                                                        |              | $-\text{NCHCH}\underline{\text{C}}\text{H}-$ | 8.95 (t, 8.1)                                                     |                                                                      |                         |
|                                                                                                        |              | $-\text{NCH}\underline{\text{C}}\text{HCH}-$ | 8.43 (t, 7.1)                                                     |                                                                      |                         |
|                                                                                                        |              | $-\underline{\text{C}}\text{F}_3$            |                                                                   | -79.5 (s)                                                            |                         |
| $(\text{CF}_3\text{SO}_2\text{N}=\text{SO}_2)_2$                                                       | <b>7</b>     | $-\underline{\text{C}}\text{F}_3$            |                                                                   | -79.5 (s)                                                            | This work<br>and ref. 2 |
|                                                                                                        |              |                                              |                                                                   | -77.7 (s)                                                            |                         |
|                                                                                                        |              |                                              |                                                                   | -73.6 (s)                                                            |                         |
| $\text{CF}_3\text{SO}_2\text{NH}_2$                                                                    | <b>8</b>     | $-\underline{\text{N}}\text{H}_2$            | 8.02 (s)                                                          |                                                                      | This work<br>and ref. 4 |
|                                                                                                        |              |                                              | 8.07 (s)                                                          |                                                                      |                         |
|                                                                                                        |              | $-\underline{\text{C}}\text{F}_3$            |                                                                   | -80.7 (s)                                                            |                         |
|                                                                                                        |              |                                              |                                                                   | -81.2 (s)                                                            | This work<br>and ref. 4 |

**Table S3.** Crystal data and structure refinement for CF<sub>3</sub>SO<sub>2</sub>N<sup>(-)</sup>SO<sub>2</sub>N<sup>(+)</sup>(CH<sub>2</sub>CH<sub>3</sub>)<sub>3</sub> (**6c**).

|                                             |                                                                                            |
|---------------------------------------------|--------------------------------------------------------------------------------------------|
| Identification code                         | C <sub>7</sub> H <sub>15</sub> F <sub>3</sub> N <sub>2</sub> O <sub>4</sub> S <sub>2</sub> |
| Empirical formula                           | C <sub>7</sub> H <sub>15</sub> F <sub>3</sub> N <sub>2</sub> O <sub>4</sub> S <sub>2</sub> |
| Formula weight                              | 312.33                                                                                     |
| Temperature/K                               | 100.00 (10)                                                                                |
| Crystal system                              | monoclinic                                                                                 |
| Space group                                 | P21/n                                                                                      |
| a / Å                                       | 10.71570 (10)                                                                              |
| b / Å                                       | 9.79090 (10)                                                                               |
| c / Å                                       | 12.25870 (10)                                                                              |
| α / °                                       | 90                                                                                         |
| β / °                                       | 97.9860 (10)                                                                               |
| γ / °                                       | 90                                                                                         |
| Volume / Å <sup>3</sup>                     | 1273.67 (2)                                                                                |
| Z                                           | 4                                                                                          |
| ρ <sub>calc</sub> /cm <sup>3</sup>          | 1.629                                                                                      |
| μ / mm <sup>-1</sup>                        | 4.282                                                                                      |
| F(000)                                      | 648                                                                                        |
| Crystal size / mm <sup>3</sup>              | 0.28*0.22*0.18                                                                             |
| Radiation                                   | Cu Kα (λ = 1.54184)                                                                        |
| 2θ range for data collection / °            | 10.282 to 147.908                                                                          |
| Index ranges                                | -13 ≤ h ≤ 13, -12 ≤ k ≤ 12, -15 ≤ l ≤ 14                                                   |
| Reflections collected                       | 28042                                                                                      |
| Independent reflections                     | 2572 [R <sub>int</sub> = 0.0359, R <sub>sigma</sub> = 0.0121]                              |
| Data/restraints/parameters                  | 2572/0/167                                                                                 |
| Goodness-of-fit on F <sup>2</sup>           | 1.071                                                                                      |
| Final R indexes [I ≥ 2σ (I)]                | R <sub>1</sub> = 0.0250, wR <sub>2</sub> = 0.0662                                          |
| Final R indexes [all data]                  | R <sub>1</sub> = 0.0251, wR <sub>2</sub> = 0.0663                                          |
| Largest diff. peak/hole / e Å <sup>-3</sup> | 0.39/-0.36                                                                                 |

**Table S4.** Bond length data for CF<sub>3</sub>SO<sub>2</sub>N<sup>(-)</sup>SO<sub>2</sub>N<sup>(+)</sup>(CH<sub>2</sub>CH<sub>3</sub>)<sub>3</sub> (**6c**).

| Atom | Atom | Length / Å | Atom | Atom | Length / Å |
|------|------|------------|------|------|------------|
| S2   | O2   | 1.4287     | F2   | C1   | 1.3341     |
| S2   | O1   | 1.4285     | F1   | C1   | 1.3205     |
| S2   | N1   | 1.5839     | N2   | C4   | 1.5284     |
| S2   | C1   | 1.8323     | N2   | C7   | 1.5268     |
| S1   | O4   | 1.4266     | N2   | C2   | 1.5276     |
| S1   | O3   | 1.4251     | C4   | C5   | 1.5168     |
| S1   | N2   | 1.8668     | C7   | C6   | 1.5147     |
| S1   | N1   | 1.5710     | C2   | C3   | 1.5166     |
| F3   | C1   | 1.3294     |      |      |            |

**Table S5.** Bond angle data for CF<sub>3</sub>SO<sub>2</sub>N<sup>(-)</sup>SO<sub>2</sub>N<sup>(+)</sup>(CH<sub>2</sub>CH<sub>3</sub>)<sub>3</sub> (**6c**).

| Atom | Atom | Atom | Angle / ° | Atom | Atom | Atom | Angle / ° |
|------|------|------|-----------|------|------|------|-----------|
| O2   | S2   | N1   | 116.38    | C7   | N2   | C4   | 112.12    |
| O2   | S2   | C1   | 104.99    | C7   | N2   | C2   | 109.18    |
| O1   | S2   | O2   | 118.70    | C2   | N2   | S1   | 110.84    |
| O1   | S2   | N1   | 107.91    | C2   | N2   | C4   | 108.84    |
| O1   | S2   | C1   | 104.09    | S1   | N1   | S2   | 125.34    |
| N1   | S2   | C1   | 102.71    | C5   | C4   | N2   | 114.95    |
| O4   | S1   | N2   | 103.89    | C6   | C7   | N2   | 115.24    |
| O4   | S1   | N1   | 116.77    | F3   | C1   | S2   | 111.19    |
| O3   | S1   | O4   | 119.07    | F3   | C1   | F2   | 108.08    |
| O3   | S1   | N2   | 102.75    | F2   | C1   | S2   | 109.29    |
| O3   | S1   | N1   | 109.43    | F1   | C1   | S2   | 111.03    |
| N1   | S1   | N2   | 102.19    | F1   | C1   | F3   | 108.72    |
| C4   | N2   | S1   | 107.22    | F1   | C1   | F2   | 108.45    |
| C7   | N2   | S1   | 108.64    | C3   | C2   | N2   | 116.51    |

**Table S6.** Crystal data and structure refinement for CF<sub>3</sub>SO<sub>2</sub>N<sup>(-)</sup>SO<sub>2</sub>N<sup>(+)</sup>C<sub>5</sub>H<sub>5</sub> (**6e**).

|                                             |                                                                                           |
|---------------------------------------------|-------------------------------------------------------------------------------------------|
| Identification code                         | C <sub>6</sub> H <sub>5</sub> F <sub>3</sub> N <sub>2</sub> O <sub>4</sub> S <sub>2</sub> |
| Empirical formula                           | C <sub>6</sub> H <sub>5</sub> F <sub>3</sub> N <sub>2</sub> O <sub>4</sub> S <sub>2</sub> |
| Formula weight                              | 290.24                                                                                    |
| Temperature/K                               | 100.00 (10)                                                                               |
| Crystal system                              | monoclinic                                                                                |
| Space group                                 | Cc                                                                                        |
| a / Å                                       | 6.92930 (10)                                                                              |
| b / Å                                       | 15.0444 (2)                                                                               |
| c / Å                                       | 10.37300 (10)                                                                             |
| α / °                                       | 90                                                                                        |
| β / °                                       | 106.3650 (10)                                                                             |
| γ / °                                       | 90                                                                                        |
| Volume / Å <sup>3</sup>                     | 1037.55 (2)                                                                               |
| Z                                           | 4                                                                                         |
| ρ <sub>calc</sub> /cm <sup>3</sup>          | 1.858                                                                                     |
| μ / mm <sup>-1</sup>                        | 5.220                                                                                     |
| F(000)                                      | 584.0                                                                                     |
| Crystal size / mm <sup>3</sup>              | 0.25 × 0.2 × 0.15                                                                         |
| Radiation                                   | Cu Kα (λ = 1.54184)                                                                       |
| 2θ range for data collection / °            | 11.764 to 147.786                                                                         |
| Index ranges                                | -8 ≤ h ≤ 8, -18 ≤ k ≤ 18, -12 ≤ l ≤ 12                                                    |
| Reflections collected                       | 9536                                                                                      |
| Independent reflections                     | 2038 [R <sub>int</sub> = 0.0296, R <sub>sigma</sub> = 0.0153]                             |
| Data/restraints/parameters                  | 2038/2/155                                                                                |
| Goodness-of-fit on F <sup>2</sup>           | 1.088                                                                                     |
| Final R indexes [I ≥ 2σ (I)]                | R <sub>1</sub> = 0.0305, wR <sub>2</sub> = 0.0789                                         |
| Final R indexes [all data]                  | R <sub>1</sub> = 0.0305, wR <sub>2</sub> = 0.0789                                         |
| Largest diff. peak/hole / e Å <sup>-3</sup> | 0.47/-0.35                                                                                |

**Table S7.** Bond length data for CF<sub>3</sub>SO<sub>2</sub>N<sup>(-)</sup>SO<sub>2</sub>N<sup>(+)</sup>C<sub>5</sub>H<sub>5</sub> (**6e**).

| Atom | Atom | Length / Å | Atom | Atom | Length / Å |
|------|------|------------|------|------|------------|
| S1   | O2   | 1.422      | N1   | C2   | 1.365      |
| S1   | O1   | 1.424      | F3   | C1   | 1.340      |
| S1   | N1   | 1.794      | F1   | C1   | 1.324      |
| S1   | N2   | 1.552      | C6   | C5   | 1.369      |
| S2   | O3   | 1.423      | F2   | C1   | 1.314      |
| S2   | O4   | 1.435      | C2   | C3   | 1.366      |
| S2   | N2   | 1.592      | C5   | C4   | 1.392      |
| S2   | C1   | 1.833      | C4   | C3   | 1.384      |
| N1   | C6   | 1.342      |      |      |            |

**Table S8.** Bond angle data for CF<sub>3</sub>SO<sub>2</sub>N<sup>(-)</sup>SO<sub>2</sub>N<sup>(+)</sup>C<sub>5</sub>H<sub>5</sub> (**6e**).

| Atom | Atom | Atom | Angle / ° | Atom | Atom | Atom | Angle / ° |
|------|------|------|-----------|------|------|------|-----------|
| O2   | S1   | O1   | 119.93    | C2   | N1   | S1   | 118.1     |
| O2   | S1   | N1   | 102.07    | N1   | C6   | C5   | 120.5     |
| O2   | S1   | N2   | 116.02    | N1   | C2   | C3   | 119.2     |
| O1   | S1   | N1   | 102.67    | S1   | N2   | S2   | 122.5     |
| O1   | S1   | N2   | 109.09    | C6   | C5   | C4   | 119.0     |
| N2   | S1   | N1   | 104.61    | C3   | C4   | C5   | 119.6     |
| O3   | S2   | O4   | 118.88    | C2   | C3   | C4   | 120.0     |
| O3   | S2   | N2   | 110.59    | F3   | C1   | S2   | 109.8     |
| O3   | S2   | C1   | 105.4     | F1   | C1   | S2   | 111.4     |
| O4   | S2   | N2   | 115.47    | F1   | C1   | F3   | 109.7     |
| O4   | S2   | C1   | 104.3     | F2   | C1   | S2   | 108.5     |
| N2   | S2   | C1   | 99.4      | F2   | C1   | F3   | 108.0     |
| C6   | N1   | S1   | 120.2     | F2   | C1   | F1   | 109.3     |
| C6   | N1   | C2   | 121.7     |      |      |      |           |

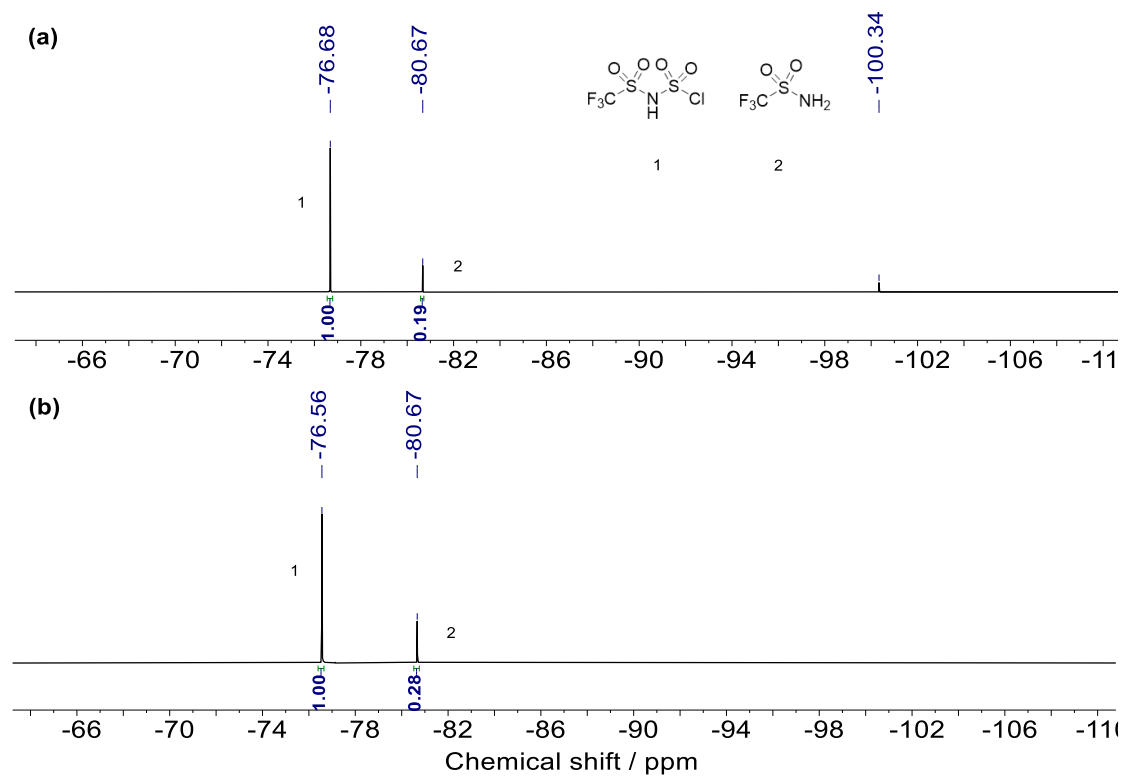

**Figure S1.**  $^{19}\text{F}$  NMR spectra of the reactions between H[CITFSI] and equivalent amount of  $\text{H}_2\text{O}$  for 4 h (a) and 24 h (b) (reaction temperature: 20 °C; solvent: acetone- $d_6$ ).

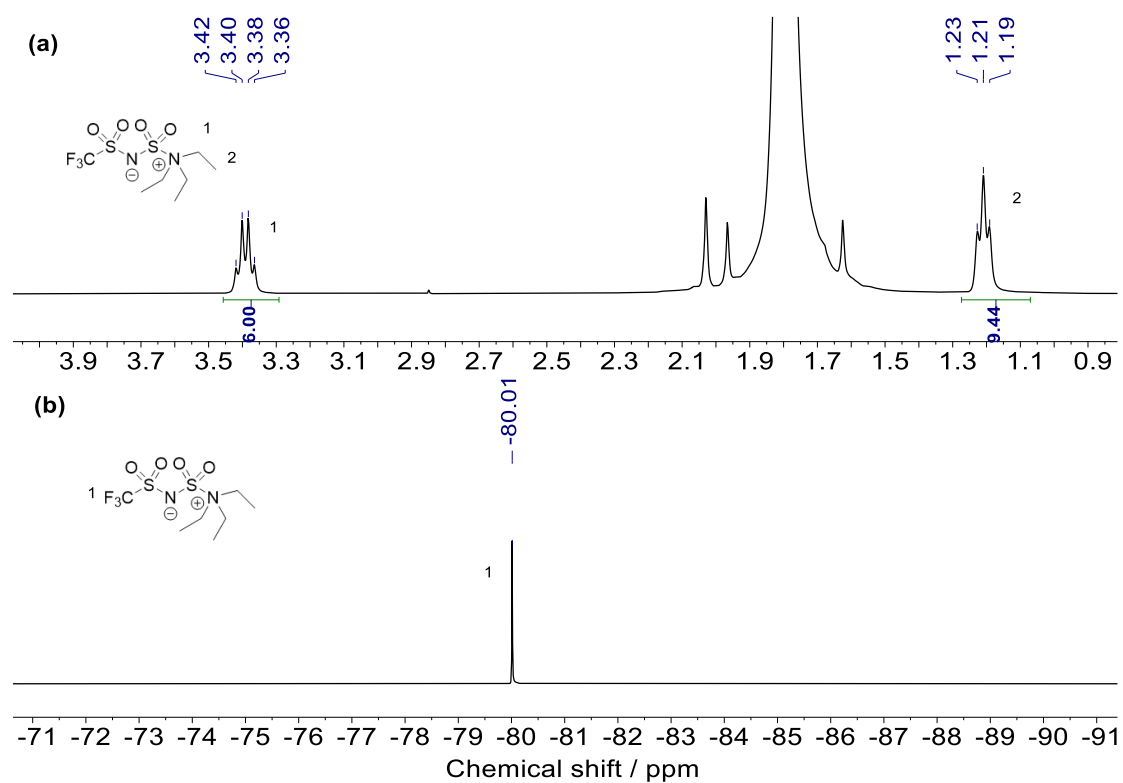

**Figure S2.**  $^1\text{H}$  NMR (a) and  $^{19}\text{F}$  NMR (b) spectra of the reaction between compound **6c** and equivalent amount of  $\text{H}_2\text{O}$  for 24 h utilizing acetonitrile as solvent (reaction temperature:  $20\text{ }^\circ\text{C}$ ; solvent: acetone- $d_6$ ).

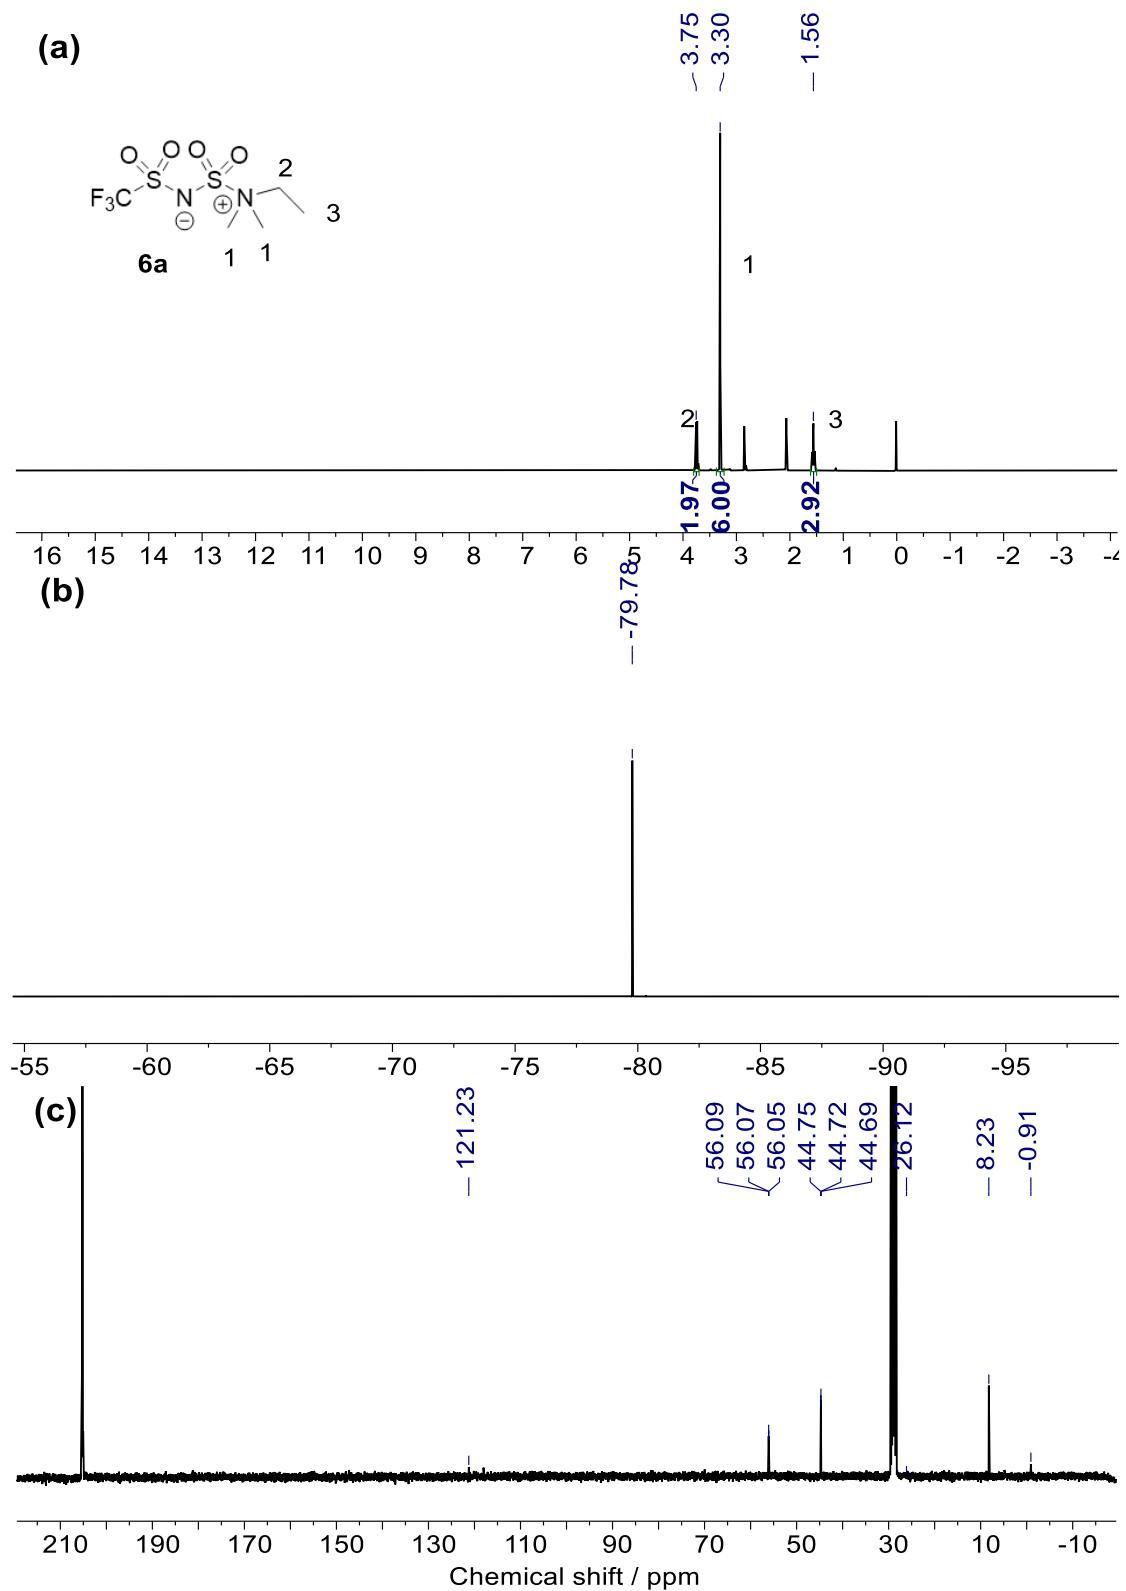

Figure S3.  $^1\text{H}$  NMR (a),  $^{19}\text{F}$  NMR (b), and  $^{13}\text{C}$  NMR (c) spectra of compound **6a** (solvent: acetone- $d_6$ ).

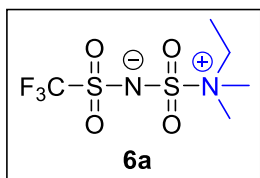

(Dimethylethylammoniumsulfonyl)(trifluoromethanesulfonyl)imide

**Acquisition Parameter**

|             |          |                      |          |                  |           |
|-------------|----------|----------------------|----------|------------------|-----------|
| Source Type | ESI      | Ion Polarity         | Positive | Set Nebulizer    | 1.0 Bar   |
| Focus       | Active   |                      |          | Set Dry Heater   | 200 °C    |
| Scan Begin  | 50 m/z   | Set Capillary        | 4500 V   | Set Dry Gas      | 4.0 l/min |
| Scan End    | 1200 m/z | Set End Plate Offset | -500 V   | Set Divert Valve | Waste     |

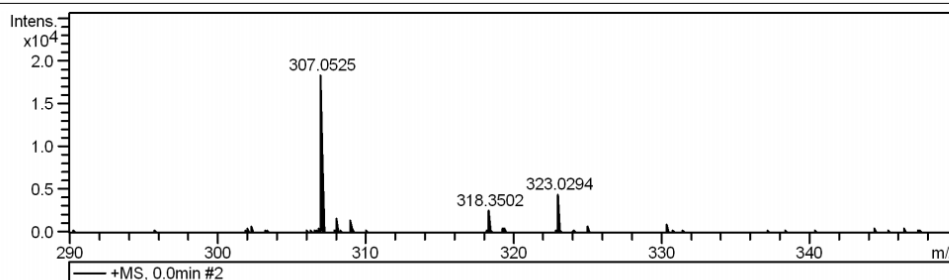

| # | m/z      | Res. | S/N  | I     | FWHM   |
|---|----------|------|------|-------|--------|
| 1 | 307.0525 | 6976 | 75.4 | 18398 | 0.0440 |
| 2 | 308.0548 | 6651 | 6.5  | 1593  | 0.0463 |
| 3 | 309.0489 | 6233 | 6.0  | 1477  | 0.0496 |
| 4 | 318.3502 | 5448 | 10.4 | 2626  | 0.0584 |
| 5 | 323.0294 | 7290 | 18.1 | 4524  | 0.0443 |

Figure S4. Mass spectrum of compound 6a.

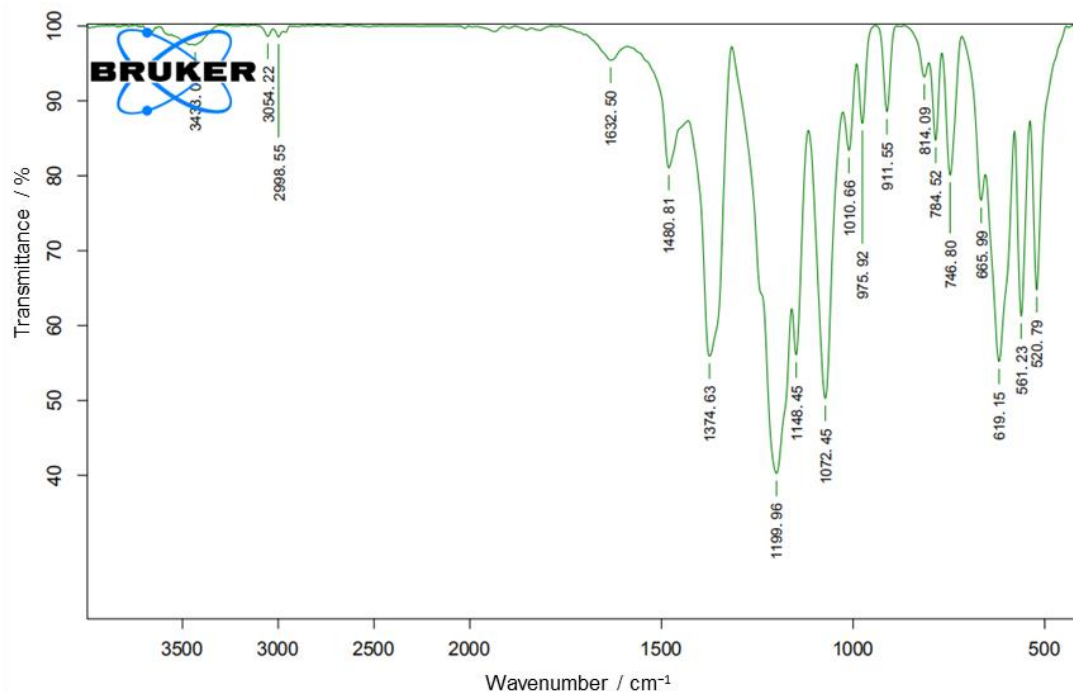

Figure S5. FT-IR spectrum of compound 6a.



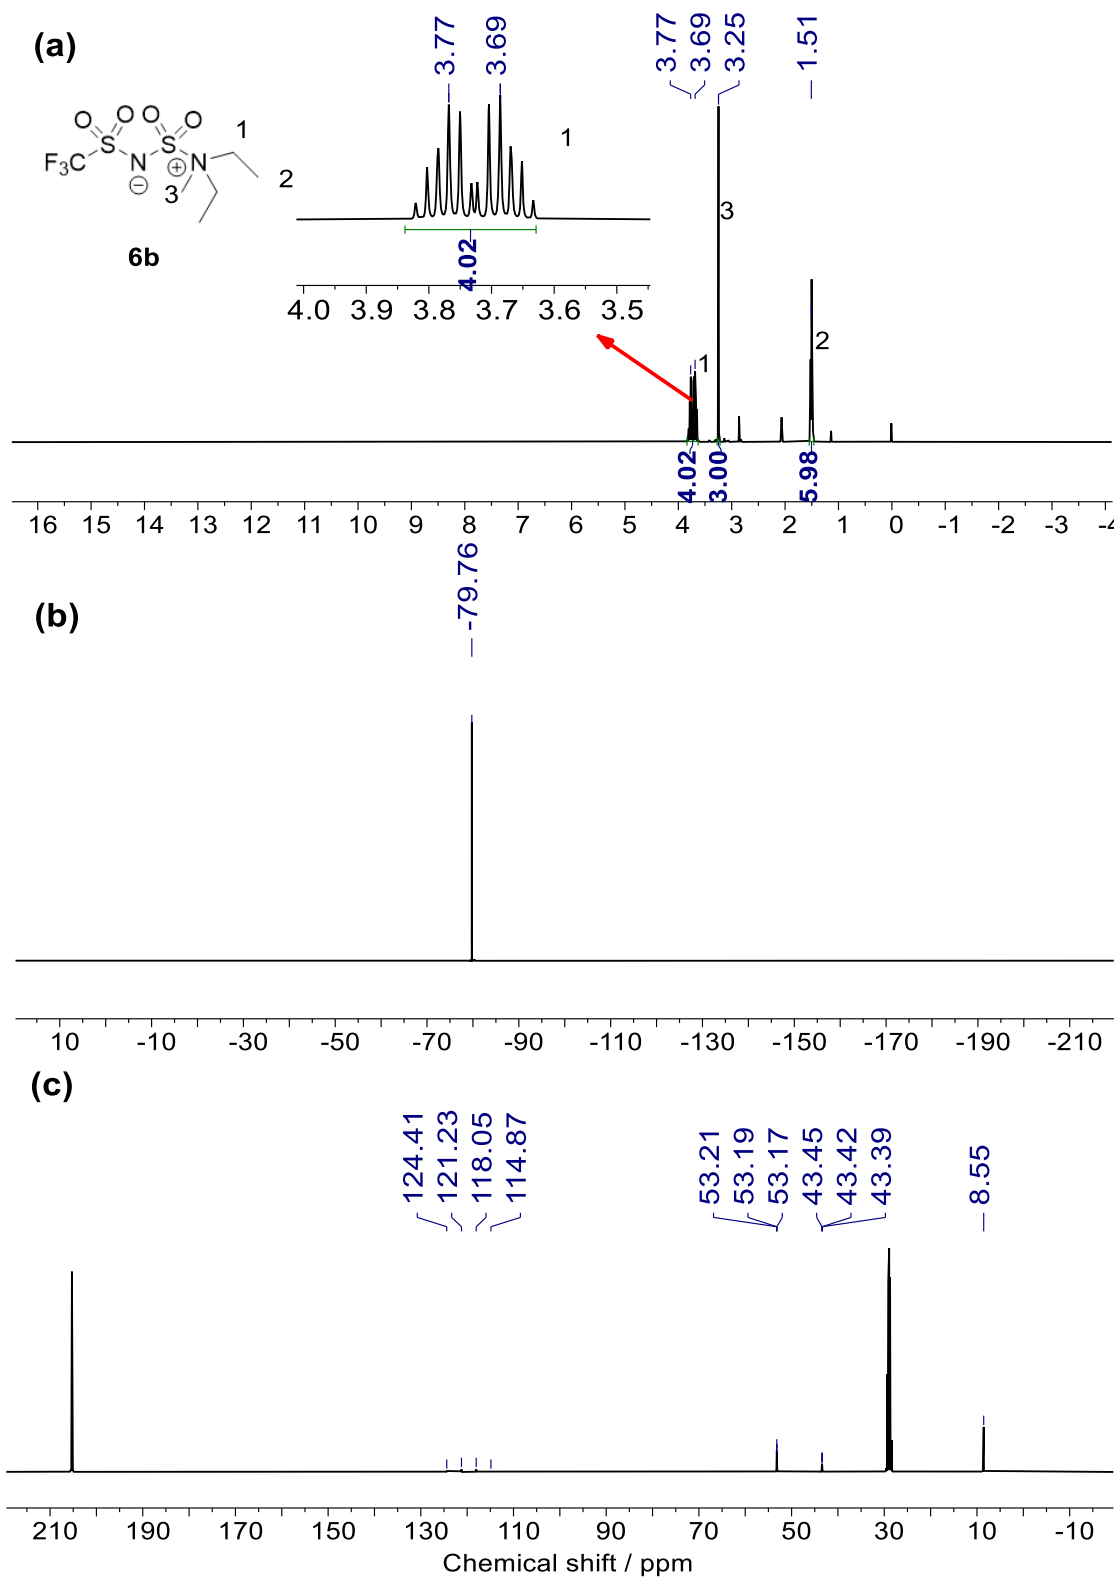

**Figure S6.**  $^1\text{H}$  NMR (a),  $^{19}\text{F}$  NMR (b), and  $^{13}\text{C}$  NMR (c) spectra of compound **6b** (solvent: acetone- $d_6$ ).

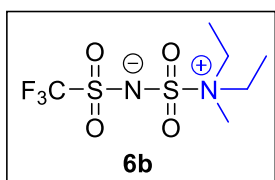

(Diethylmethylammoniumsulfonyl)(trifluoromethanesulfonyl)imide

**Acquisition Parameter**

|             |          |                      |          |                  |           |
|-------------|----------|----------------------|----------|------------------|-----------|
| Source Type | ESI      | Ion Polarity         | Positive | Set Nebulizer    | 1.0 Bar   |
| Focus       | Active   |                      |          | Set Dry Heater   | 200 °C    |
| Scan Begin  | 50 m/z   | Set Capillary        | 4500 V   | Set Dry Gas      | 4.0 l/min |
| Scan End    | 1200 m/z | Set End Plate Offset | -500 V   | Set Divert Valve | Waste     |

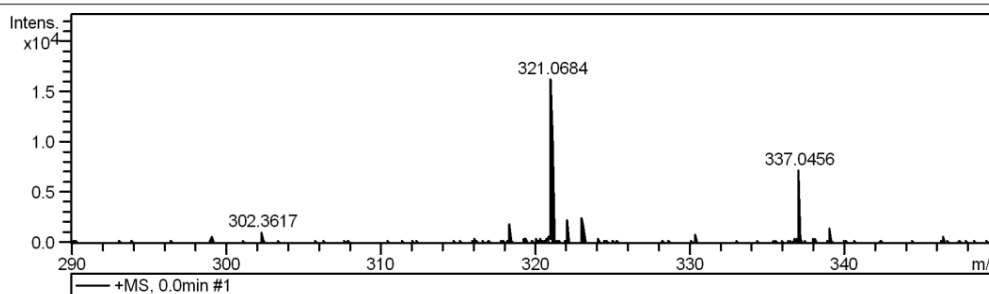

| # | m/z      | Res.  | S/N  | I     | FWHM   |
|---|----------|-------|------|-------|--------|
| 1 | 302.3617 | 15619 | 3.1  | 1200  | 0.0194 |
| 2 | 318.3445 | 4986  | 4.7  | 1916  | 0.0638 |
| 3 | 321.0684 | 5788  | 40.1 | 16304 | 0.0555 |
| 4 | 322.0720 | 10841 | 5.8  | 2356  | 0.0297 |
| 5 | 323.0714 | 7939  | 6.2  | 2492  | 0.0407 |
| 6 | 337.0456 | 8335  | 19.1 | 7280  | 0.0404 |
| 7 | 339.0414 | 11458 | 4.1  | 1540  | 0.0296 |

Figure S7. Mass spectrum of compound 6b.

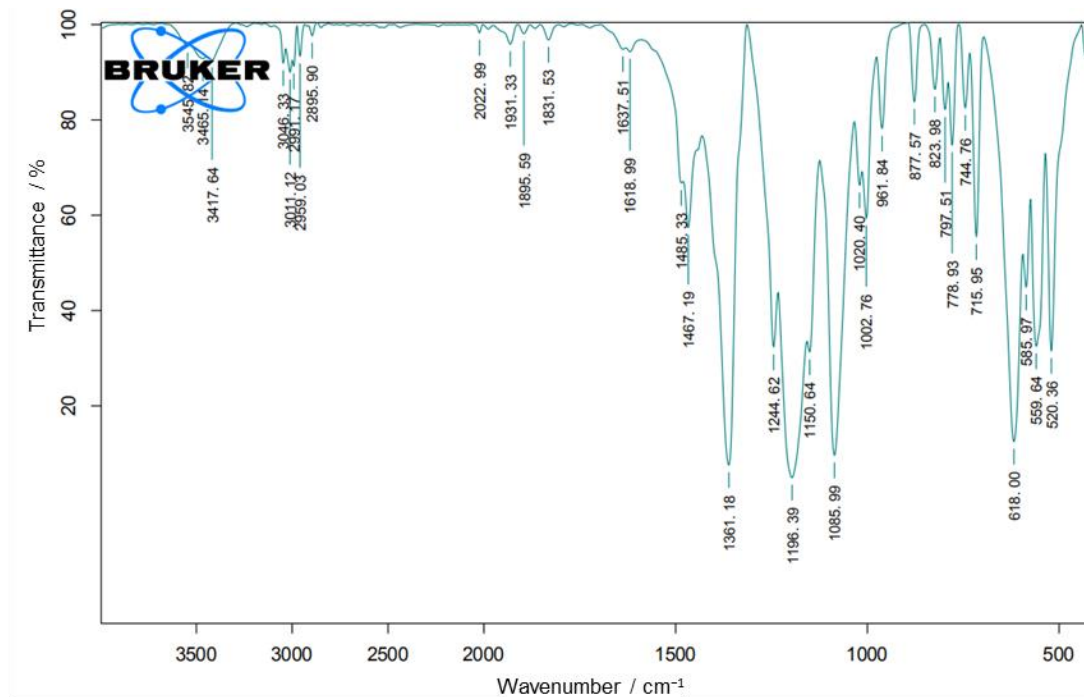

Figure S8. FT-IR spectrum of compound 6b.

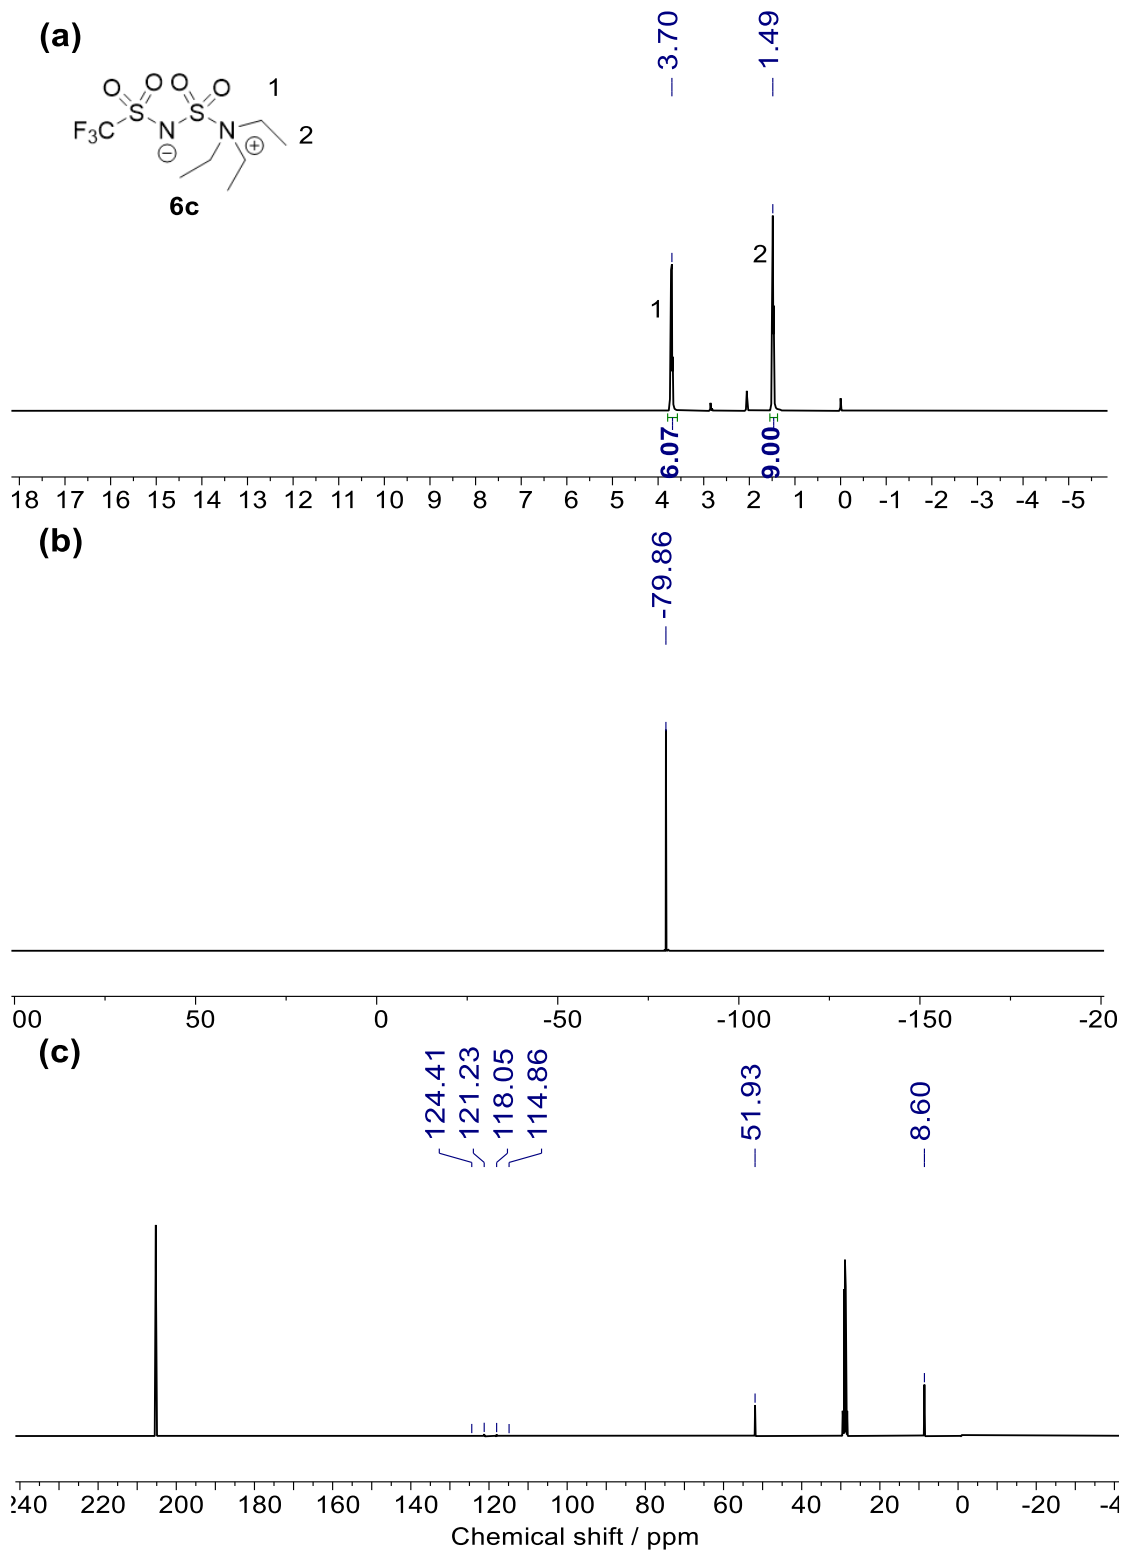

**Figure S9.**  $^1\text{H}$  NMR (a),  $^{19}\text{F}$  NMR (b), and  $^{13}\text{C}$  NMR (c) spectra of compound **6c** (solvent: acetone- $d_6$ ).

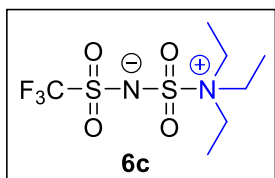

(Triethylammoniumsulfonyl)(trifluoromethanesulfonyl)imide

**Acquisition Parameter**

|             |          |                      |          |                  |           |
|-------------|----------|----------------------|----------|------------------|-----------|
| Source Type | ESI      | Ion Polarity         | Positive | Set Nebulizer    | 0.3 Bar   |
| Focus       | Active   |                      |          | Set Dry Heater   | 200 °C    |
| Scan Begin  | 50 m/z   | Set Capillary        | 4500 V   | Set Dry Gas      | 4.0 l/min |
| Scan End    | 2200 m/z | Set End Plate Offset | -500 V   | Set Divert Valve | Waste     |

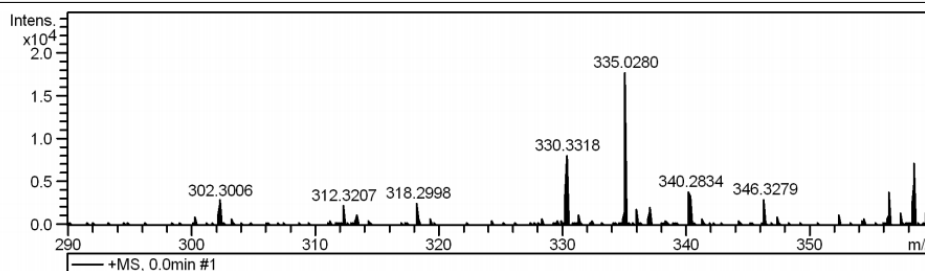

| #  | m/z      | Res.  | S/N  | I     | FWHM   |
|----|----------|-------|------|-------|--------|
| 1  | 302.3006 | 7473  | 8.0  | 2908  | 0.0405 |
| 2  | 312.3207 | 6146  | 6.2  | 2356  | 0.0508 |
| 3  | 313.3275 | 5567  | 1.5  | 556   | 0.0563 |
| 4  | 318.2998 | 7157  | 6.8  | 2628  | 0.0445 |
| 5  | 330.3318 | 9599  | 20.2 | 8144  | 0.0344 |
| 6  | 331.3354 | 6540  | 3.2  | 1288  | 0.0507 |
| 7  | 335.0280 | 8946  | 43.5 | 17788 | 0.0374 |
| 8  | 336.0306 | 6623  | 4.8  | 1952  | 0.0507 |
| 9  | 337.0296 | 9262  | 5.1  | 2104  | 0.0364 |
| 10 | 340.2834 | 8392  | 9.5  | 3944  | 0.0405 |
| 11 | 346.3279 | 11438 | 7.2  | 3048  | 0.0303 |
| 12 | 352.3241 | 15602 | 2.9  | 1236  | 0.0226 |
| 13 | 356.3505 | 8968  | 8.9  | 3880  | 0.0397 |
| 14 | 357.3474 | 21862 | 3.4  | 1508  | 0.0163 |
| 15 | 358.3635 | 9466  | 16.5 | 7280  | 0.0379 |
| 16 | 359.3716 | 5980  | 3.4  | 1492  | 0.0601 |
| 17 | 360.3242 | 19314 | 2.6  | 1132  | 0.0187 |
| 18 | 362.3222 | 12666 | 4.9  | 2176  | 0.0286 |

Figure S10. Mass spectrum of compound 6c.

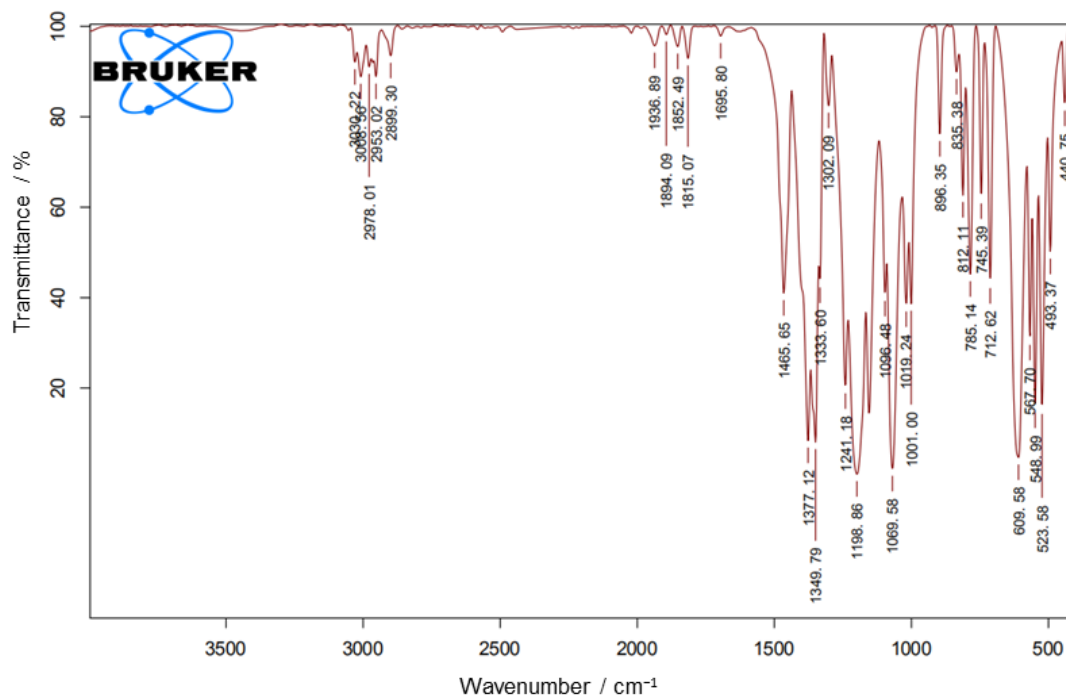

Figure S11. FT-IR spectrum of compound 6c.

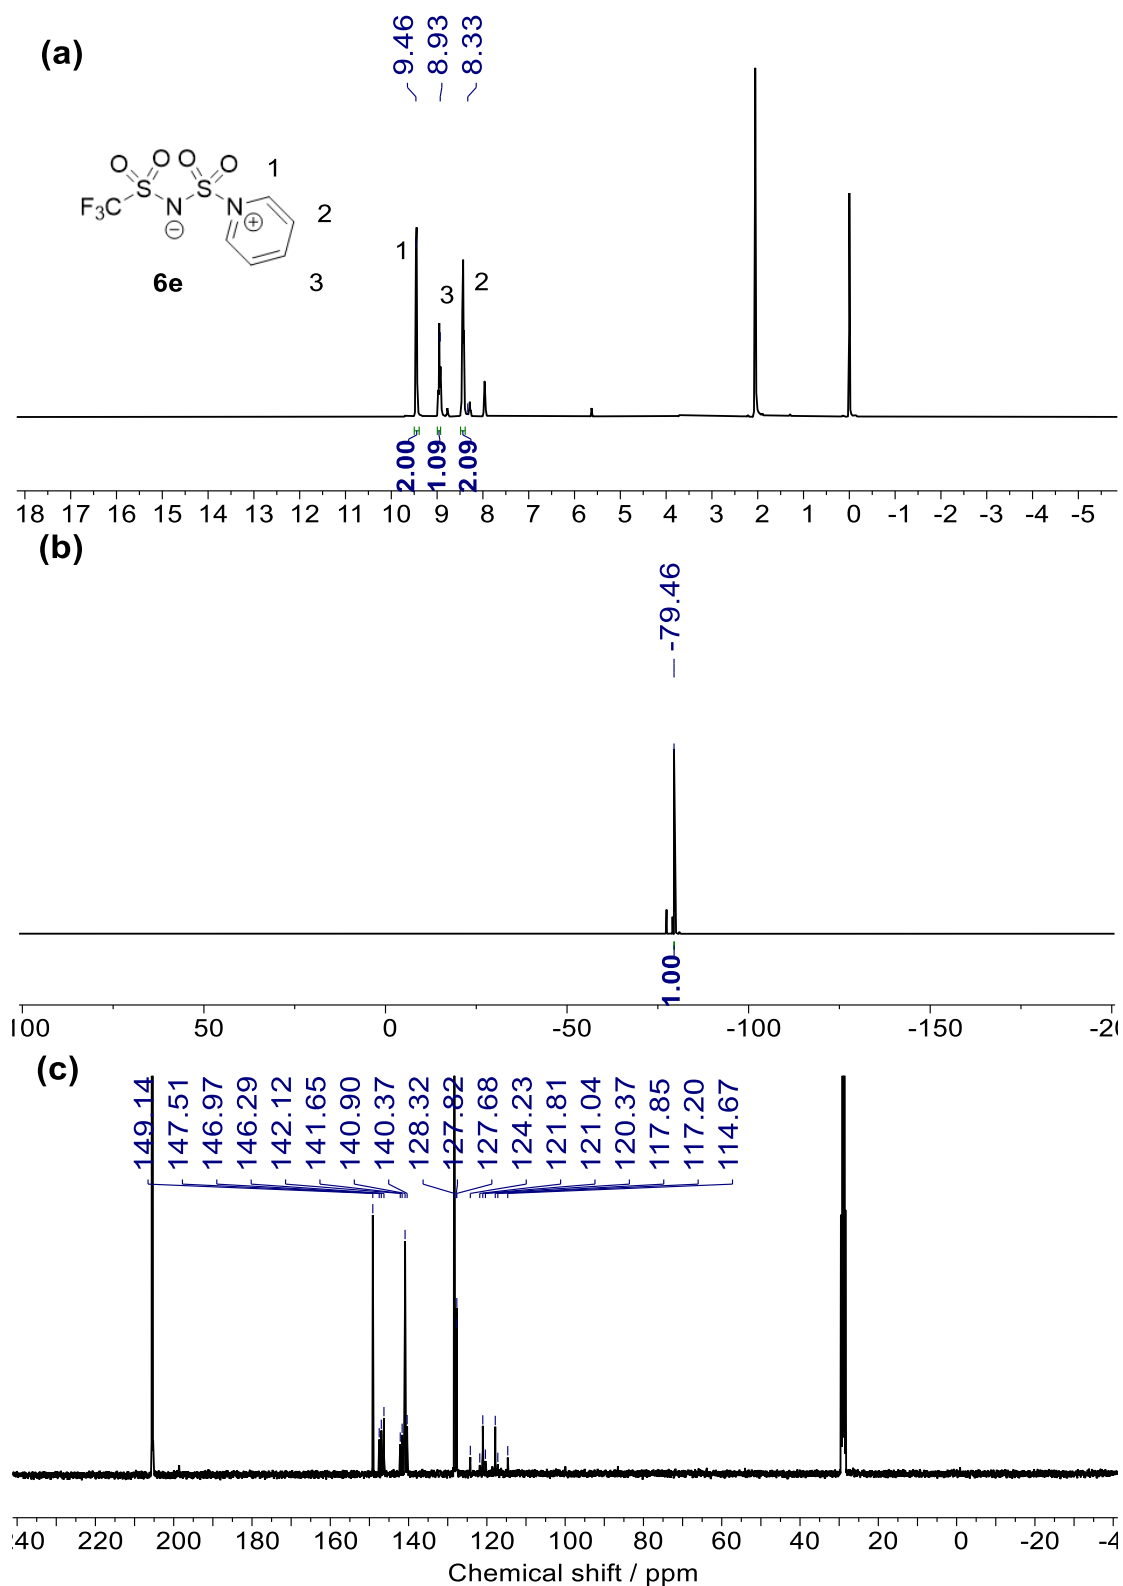

Figure S12.  $^1\text{H}$  NMR (a),  $^{19}\text{F}$  NMR (b), and  $^{13}\text{C}$  NMR (c) spectra of compound **6e** (solvent: acetone- $d_6$ ).

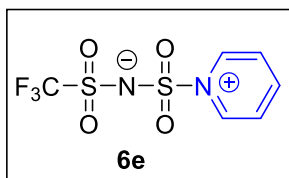

(Pyridiniumsulfonyl)(trifluoromethanesulfonyl)imide

**Acquisition Parameter**

|             |          |                      |          |                  |           |
|-------------|----------|----------------------|----------|------------------|-----------|
| Source Type | ESI      | Ion Polarity         | Positive | Set Nebulizer    | 1.0 Bar   |
| Focus       | Active   |                      |          | Set Dry Heater   | 200 °C    |
| Scan Begin  | 50 m/z   | Set Capillary        | 4500 V   | Set Dry Gas      | 6.0 l/min |
| Scan End    | 1200 m/z | Set End Plate Offset | -500 V   | Set Divert Valve | Waste     |

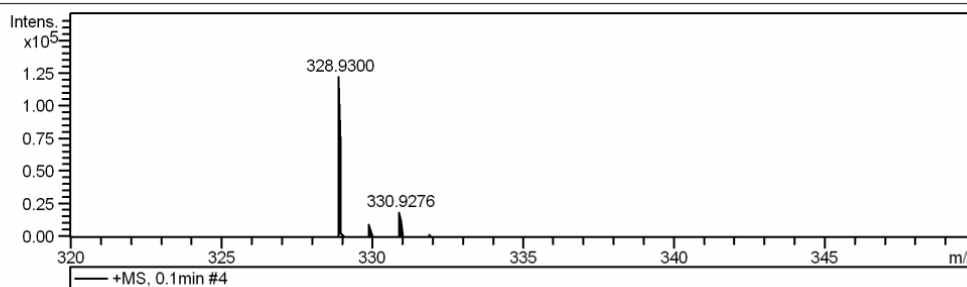

| # | m/z      | Res.  | S/N   | I      | FWHM   |
|---|----------|-------|-------|--------|--------|
| 1 | 328.9300 | 11023 | 452.9 | 122944 | 0.0298 |
| 2 | 329.9322 | 9987  | 38.5  | 10393  | 0.0330 |
| 3 | 330.9276 | 9711  | 72.7  | 19545  | 0.0341 |

Figure S13. Mass spectrum of compound 6e.

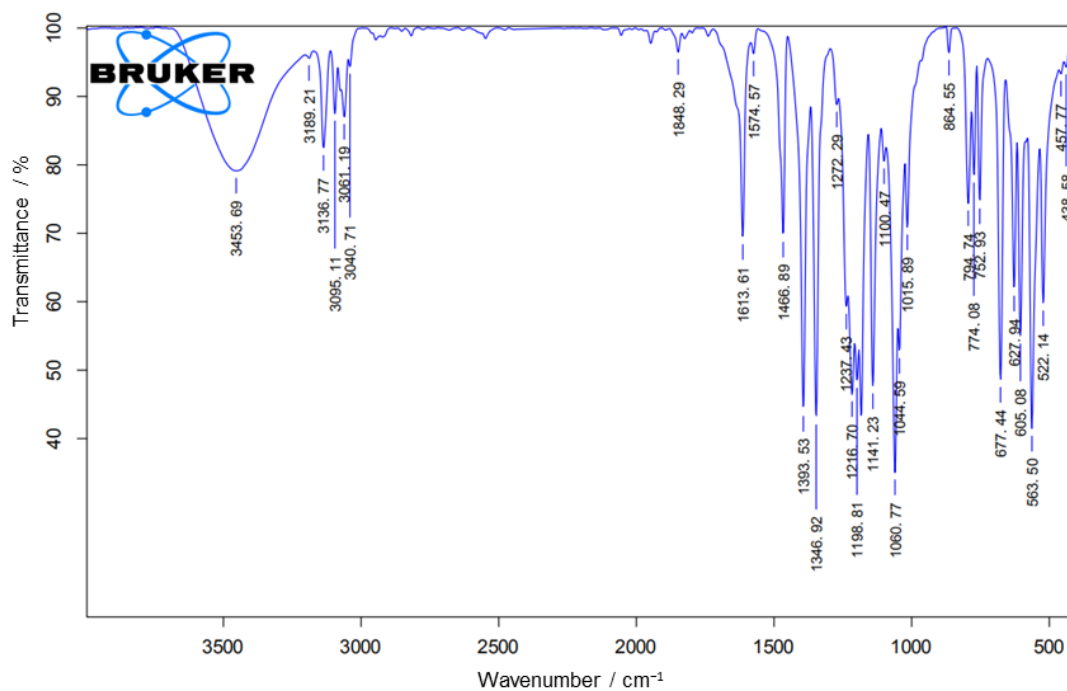

Figure S14. FT-IR spectrum of compound 6e.

## References

1. M. Beran, J. Příklad and J. Taraba, *Polyhedron*, 2010, **29**, 991-994.
2. H. Roesky, M. Aramaki and L. Schönfelder, *Z. Naturforsch.*, 1978, **33**, 1072-1076.
3. W.L.F. Armarego, C.L.L. Chai, *Purification of Laboratory Chemicals*, Butterworth-Heinemann, 2012.
4. Z. Song, L. Zheng, P. Cheng, X. Wang, H. Wu, Q. Ma, J. Liu, W. Feng, J. Nie, H. Yu, X. Huang, M. Armand, H. Zhang and Z. Zhou, *Journal of Power Sources*, 2022, **526**, 231105.
5. O. V. Dolomanov, L. J. Bourhis, R. J. Gildea, J. A. K. Howard and H. Puschmann, *Journal of Applied Crystallography*, 2009, **42**, 339-341.
6. S. Weber, *Journal of Applied Crystallography*, 1999, **32**, 1028.
